# Supplementary material for: Medication Overuse Headache in Chronic Migraine Patients Using Cannabis: A Case-Referent Study
Source: Research Square preprint supplement (doi:10.21203/rs.3.rs-185874/v1), 2021-02-08
Supplement: Supplementary file 1 [file 1c429abbc6d35b2dd502f0ec.docx]

| Age | Sex | Mig. Freq. | Duration of CM | Benzodiazepine Use | Butalbital Use | Opioid Use | Cannabis Use | MOH | Variables  Rho  p-value |
| --- | --- | --- | --- | --- | --- | --- | --- | --- | --- |
| 1 | 0.007  0.887 | -0.013  0.799 | **0.143**  **0.006** | **0.131**  **0.012** | **0.108**  **0.039** | **0.139**  **0.007** | -0.022  0.673 | **0.136**  **0.009** | Age |
|  | 1 | **-0.141**  **0.007** | 0.086  0.100 | -.025  .627 | 0.049  0.348 | 0.032  0.546 | **-0.166**  **0.001** | 0.002  0.968 | Sex |
|  |  | 1 | -0.043  0.408 | -0.016  0.756 | 0.053  0.313 | 0.072  0.168 | 0.06  0.248 | **0.147**  **0.005** | Mig. Freq. |
|  |  |  | 1 | 0.035  0.500 | **0.137**  **0.009** | 0.063  0.231 | -0.003  0.949 | 0.027  0.605 | Duration of CM |
|  |  |  |  | 1 | -0.028  0.587 | 0.088  0.092 | **0.155**  **0.003** | 0.097  0.062 | Benzodiazepine Use |
|  |  |  |  |  | 1 | **0.106**  **0.042** | 0.024  0.643 | 0.088  0.093 | Butalbital Use |
|  |  |  |  |  |  | 1 | **0.259**  **0.000** | **0.357**  **0.000** | Opioid Use |
|  |  |  |  |  |  |  | 1 | **0.398**  **0.000** | Cannabis Use |
|  |  |  |  |  |  |  |  | 1 | MOH |

Supplementary Table 1. Correlation Table of Variables. Correlation results are displayed using Spearman rho and p-values. Significant correlations are shown in bold.
